# Supplementary material for: Enhanced photoelectrochemical hydrogen production via linked BiVO4 nanoparticles on anodic WO3 nanocoral structures
Source: Royal Society of Chemistry journal article supplement (doi:10.1039/d3se01545a), 2024-01-01
Supplement: d3se01545a1.pdf [file d3se01545a1.pdf]

Supplementary information

## **Enhanced Photoelectrochemical Hydrogen Production via Linked BiVO<sub>4</sub> Nanoparticles on Anodic WO<sub>3</sub> Nanocoral Structures**

Eunoak Park, JeongEun Yoo\*, and Kiyoung Lee\*

Department of Chemistry and Chemical Engineering, Inha University, 100 Inha-ro, Michuhol-  
gu, 22212 Incheon, South Korea

\*Corresponding author

E-mail: kiyoung@inha.ac.kr (K. Lee), JeongEunYoo@inha.ac.kr (J.E. Yoo), tel./fax. +82-32-860-7466

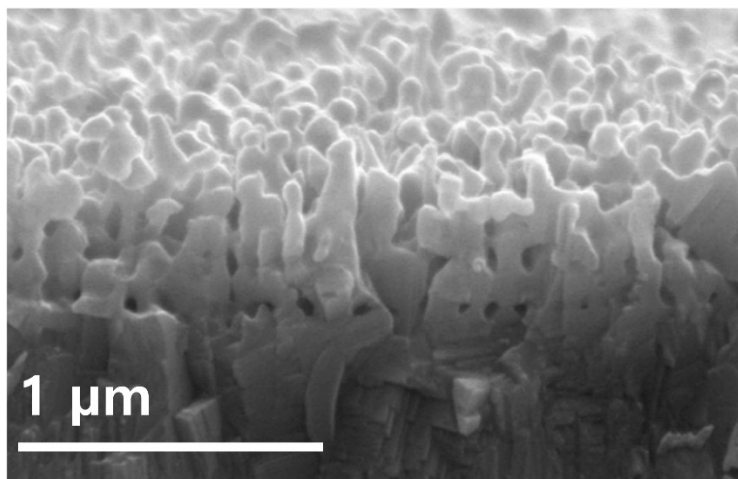

**Fig. S1** Cross-sectional view of the WO<sub>3</sub> nanocoral.

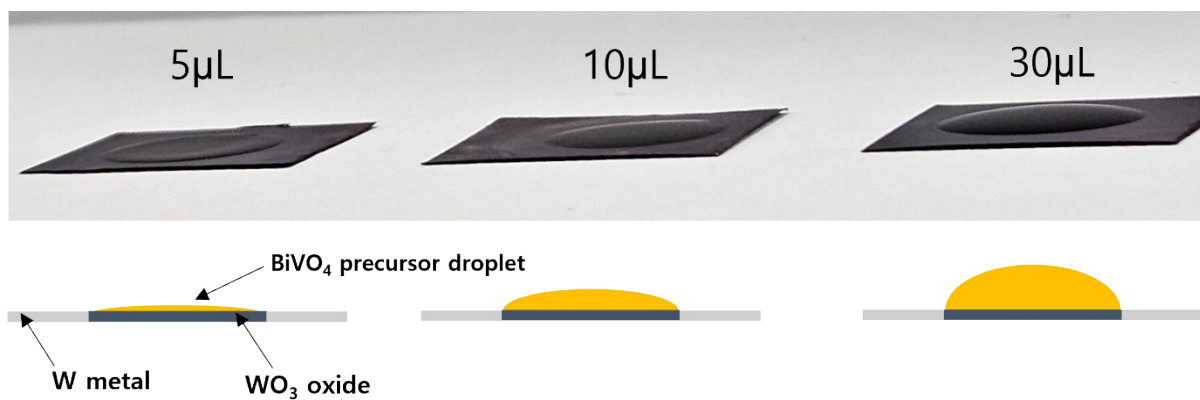

**Fig. S2** Droplets of different amounts of precursor (5, 10, and 30 μL) on the WO<sub>3</sub> nanocoral.

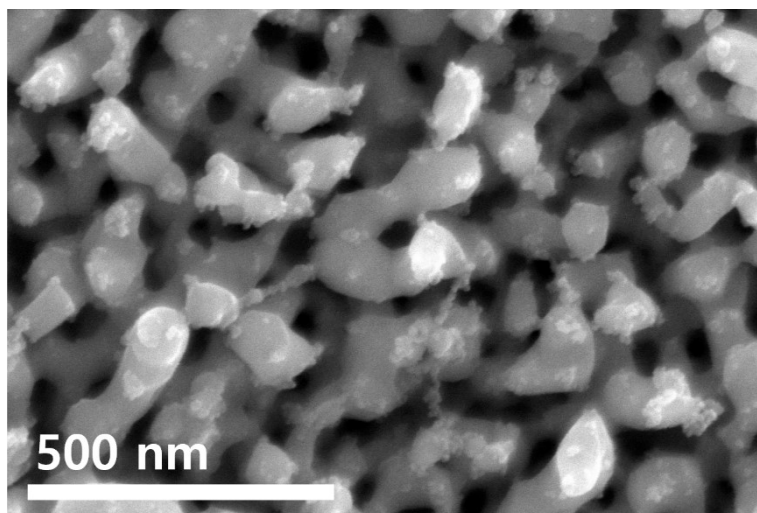

Fig. S3 Top view of the 10-BW after PEC measurements.

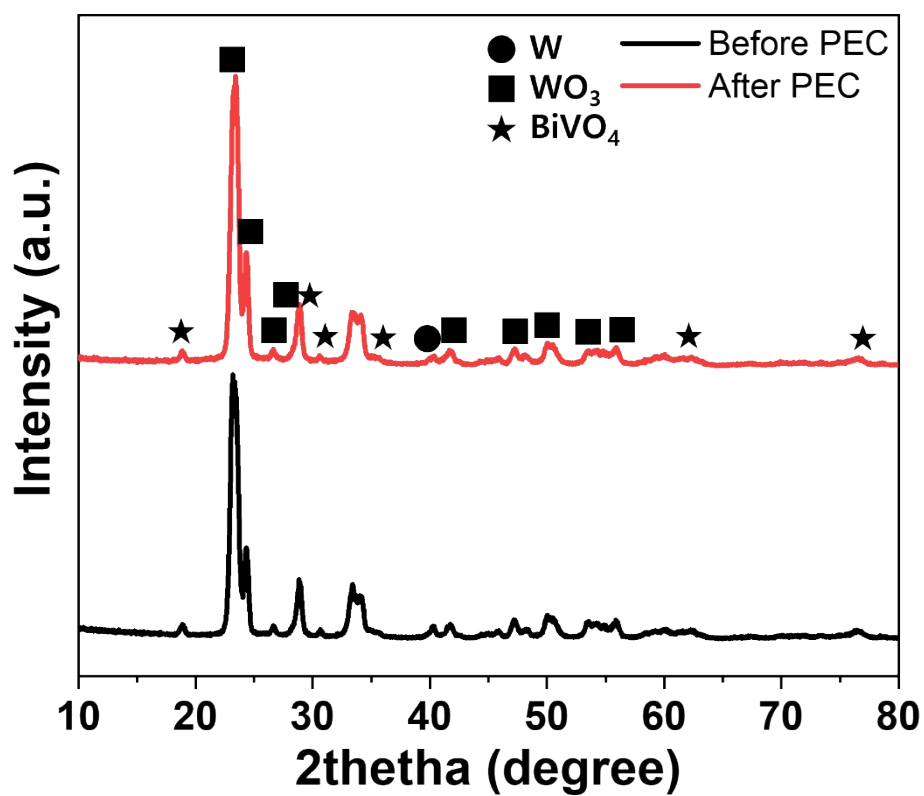

Fig. S4 XRD patterns of the 10-BW before and after PEC measurements.

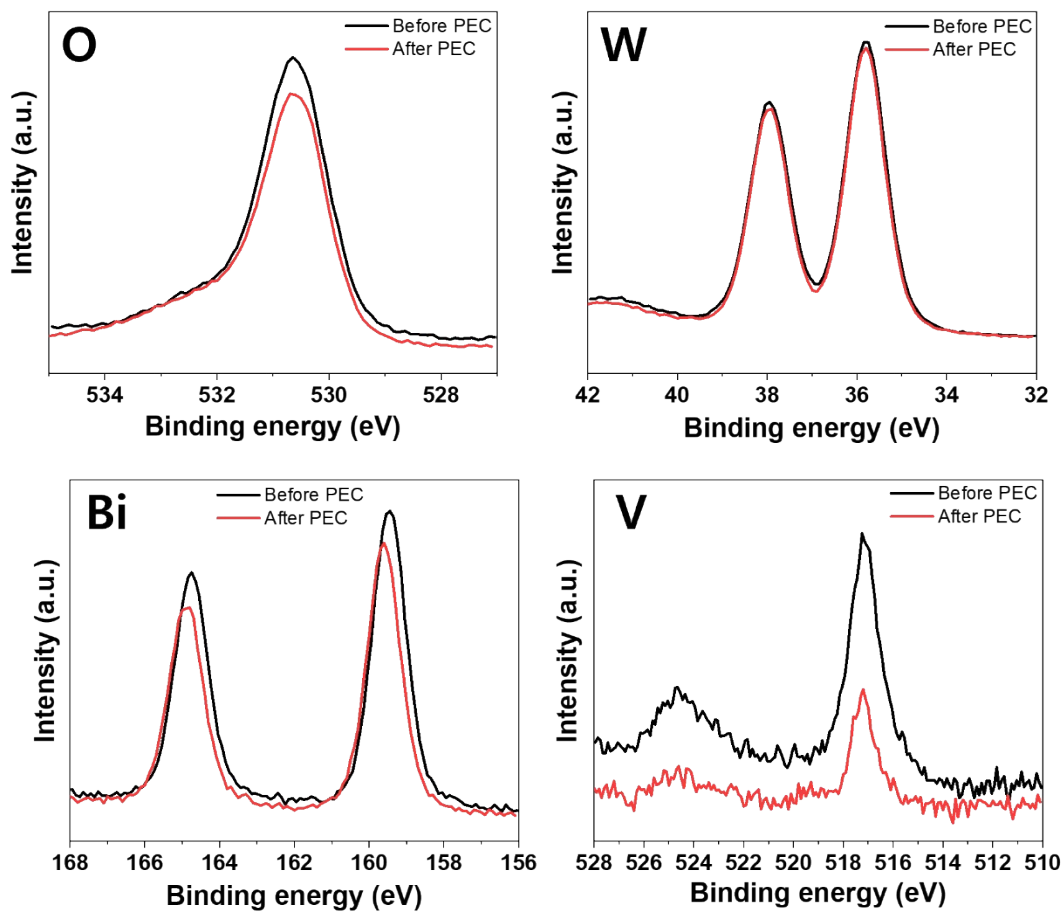

**Fig. S5** XPS spectra of the 10-BW before and after PEC measurements.

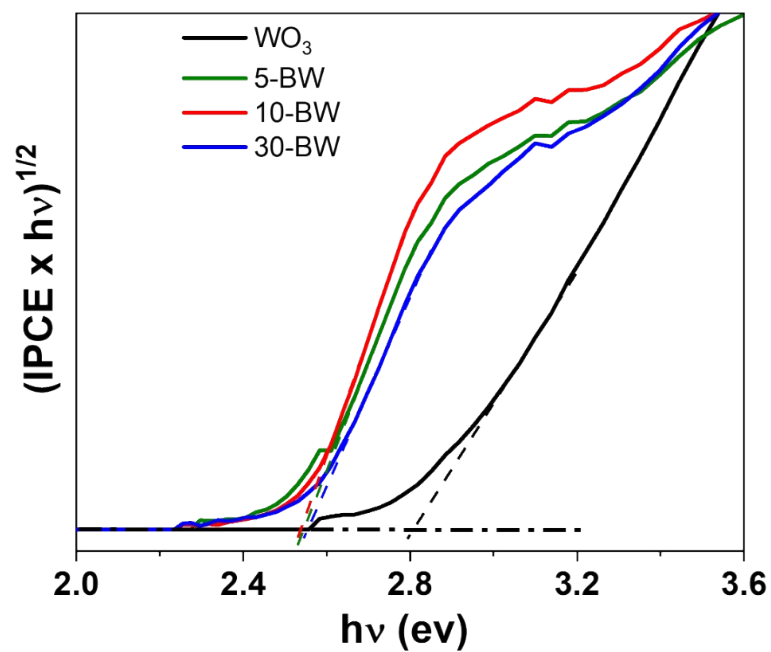

**Fig. S6**  $(\text{IPCE} \cdot h\nu)^{1/2}$  vs.  $h\nu$  plots of  $\text{WO}_3$  nanocoral, 5-BW, 10-BW, and 30-BW.

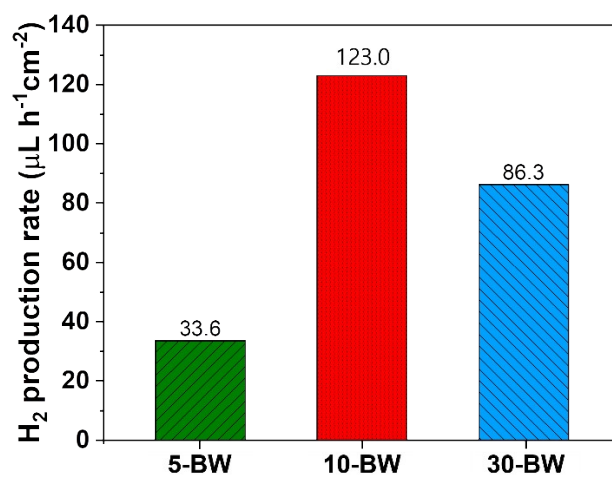

**Fig. S7**  $\text{H}_2$  production rates of 5-BW, 10-BW, and 30-BW within 30 min.

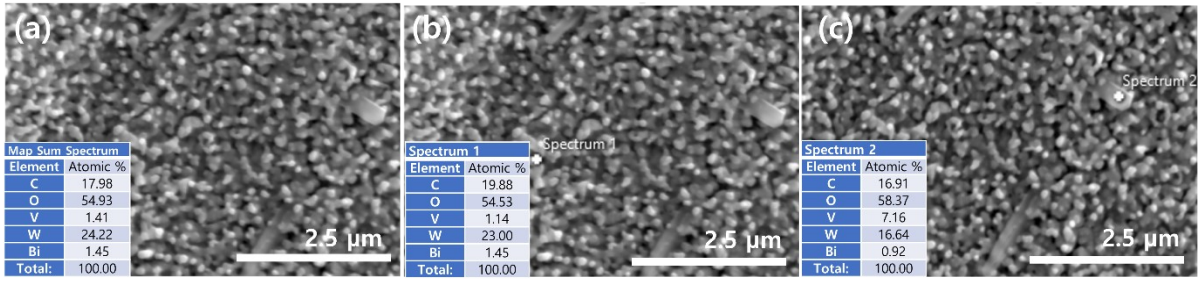

**Fig. S8** Atomic percentages of V-0.6: (a) overall area, (b) point of spectrum 1, and (c) point of spectrum 2.
